1 **Dynamic substrate preferences and predicted metabolic properties of a**  
2 **simple microbial consortium**

3  
4 Onur Erbilgin<sup>1</sup>, Benjamin P. Bowen<sup>1,2</sup>, Suzanne M. Kosina<sup>1</sup>, Stefan Jenkins<sup>1#</sup>,  
5 Rebecca K. Lau<sup>1</sup>, Trent R. Northen<sup>1,2\*</sup>

6  
7 **Affiliations**

8  
9 <sup>1</sup> Environmental Genomics and Systems Biology Division, Lawrence Berkeley  
10 National Laboratory, 1 Cyclotron Road, Berkeley, Berkeley, CA 94720

11 <sup>2</sup> Joint Genome Institute, 2800 Mitchell Dr. Walnut Creek, CA, 94598 Joint  
12 Genome Institute, 2800 Mitchell Dr. Walnut Creek, CA, 94598

13  
14 \*Corresponding author: [trnorthen@lbl.gov](mailto:trnorthen@lbl.gov)

15  
16 #Current address: Intrexon Corporation, 1750 Kraft Dr, Blacksburg, VA, 24060

17  
18 **Author Contributions**

19 OE, TRN conceived and designed the experiments

20 OE, BPB, SMK, SJ, RL performed the experiments

21 OE, BPB, SJ, TRN analyzed the data

22 OE, TRN wrote the manuscript

23 TRN contributed materials and analysis tools

24  
25 **This manuscript has been authored by Lawrence Berkeley National Lab**  
26 **under Contract No. DE-AC02-05CH11231 with the U.S. Department of**  
27 **Energy. The United States Government retains and the publisher, by**  
28 **accepting the article for publication, acknowledges that the United States**  
29 **Government retains a non-exclusive, paid-up, irrevocable, world-wide**  
30 **license to publish or reproduce the published form of this manuscript, or**  
31 **allow others to do so, for United States Government purposes.**

## 32 **Abstract**

33

34 Microorganisms are typically found as complex microbial communities that  
35 altogether govern global biogeochemical cycles. Microbes have developed highly  
36 regulated metabolic capabilities to efficiently use available substrates including  
37 preferential substrate usage that can result in diauxic shifts. This and other  
38 metabolic behaviors have been discovered in studies of microbes in mono-  
39 culture when grown on low-complexity (e.g. two-component) mixtures of  
40 substrates, however, little is known about how species partition environmental  
41 substrates through substrate competition in more complex substrate mixtures.  
42 Here we use exometabolomic profiling to examine the time-varying substrate  
43 depletion from a mixture of 19 amino acids and glucose by two *Pseudomonads*  
44 and one *Bacillus* species isolated from ground water. We examine if the first  
45 substrates depleted result in maximal growth rate, or relate to growth medium or  
46 biomass composition and find surprisingly few correlations. Patterns of substrate  
47 depletion are modeled, and these models are used to examine if substrate usage  
48 preferences and substrate depletion kinetics of three microbial isolates can be  
49 used to predict the metabolism of the pooled isolates in co-culture. We find that  
50 most of the substrates fit the model predictions, indicating that the microbes are  
51 not altering their behaviors for these substrates in the presence of competitors.  
52 Glucose and histidine were depleted more slowly than predicted, while proline,  
53 glycine, glutamate, lysine, and arginine were all consumed significantly faster;  
54 these compounds highlight substrates that could be involved in species-species  
55 interactions within the consortium.

56

## 57 **Introduction**

58

59 Microbial communities drive elemental cycling <sup>1</sup>, such as the carbon cycle <sup>2</sup> and  
60 the nitrogen cycle <sup>3</sup>. We are also learning that they are critical for the health of  
61 their host plant <sup>4</sup> or animal <sup>5</sup>. In both cases the net microbial metabolic  
62 processes are of particular interest for predicting nutrient cycles <sup>6,7</sup> and  
63 harnessing microbes to improve host health <sup>8</sup>. The environments in which  
64 microbial communities live often contain complex mixtures of substrates, and  
65 understanding how microbial communities partition these substrates is central to  
66 predicting community metabolism and developing interventions that alter  
67 community structure and/or metabolic activities.

68

69 Exometabolomics, also known as metabolic footprinting, is a powerful platform  
70 for studying how microbes and their consortia modify substrate pools, as analysis  
71 is only of the extracellular metabolites <sup>9</sup>. With the development of  
72 exometabolomics pipelines, the metabolic connections between microbes have  
73 begun to be studied at a large scale and have allowed for a more comprehensive  
74 approach to monitoring the dynamic transformations of relatively complex  
75 mixtures of substrates <sup>9</sup>. Some key examples include optimizing multiple steps of  
76 lignocellulose degradation <sup>10,11</sup>, understanding metabolic interactions between  
77 species in mixed communities <sup>12</sup>, and determining the ecological role of

78 individuals within a mixed community<sup>13-15</sup>. We have recently found exometabolite  
79 niche partitioning in two soil environments where sympatric microbes were found  
80 to target largely non-overlapping portions of the available substrates, thus  
81 minimizing substrate competition<sup>14</sup>. These experiments were focused on the  
82 endpoint depletion of substrates by isolates, not the temporal sequence of  
83 utilization. However, the order of substrate utilization (*i.e.* substrate preferences)  
84 may further discriminate the adaptive strategies of individual organisms for  
85 common substrates.

86  
87 While some work on mixed-substrate growth has been performed in continuous  
88 culture at steady state<sup>16</sup>, understanding substrate usage and competition in  
89 batch cultures may have both ecological and practical applications. Many  
90 environmental processes happen with pulsed inputs: for example the release of  
91 substrates into the soil following rainfall, light-dark cycles, digestion in animals,  
92 *etc.* Additionally, some biotechnologies that use microorganisms are also batch  
93 processes, such as the large-scale fermentations of microbe-processed foods  
94 (*e.g.* cheese, wine, *etc.*). Most of these processes use mixed microbial cultures,  
95 including one-pot processes of biomass conversion to biofuels and other  
96 biosynthetic products<sup>17-19</sup>. Studying the temporal substrate utilization by  
97 individuals is an important first step in developing approaches to better model  
98 these biochemical processes.

99  
100 As recently shown in the pioneering work by Behrends *et al.*, the kinetics of  
101 substrate depletion from a mixture of substrates can be effectively fit using a few  
102 parameters<sup>20</sup>: see **Equation (1)** in **Materials and Methods**. When compared  
103 across all substrates in an environment, these parameters have great potential in  
104 providing a direct measure of an organism's substrate preferences within that  
105 environment, effectively creating a metabolic model for the organism. Such  
106 models may be useful in classifying microorganisms for in-depth characterization  
107 of their metabolism and regulatory networks to understand the biochemical or  
108 evolutionary basis for these preferences. Furthermore, when taken into  
109 consideration with other species' models, they may also enable the prediction of  
110 the overall net metabolism of microbial consortia by aggregating individual  
111 contributions to environmental substrate usage. Observed deviations from these  
112 predictions could help identify interspecies interactions that modulate an  
113 organism's metabolism, *e.g.* communication and antagonism between microbes  
114 within communities.

115  
116 Here we compare the temporal depletion of 20 substrates by 3 isolates and fit  
117 these data to the Behrends model (**Equation 1**), describing their substrate  
118 preferences within this 'environment'. We then examine if the first substrates  
119 depleted result in maximal growth rate, or relate to growth medium or biomass  
120 composition. Finally, we developed a model that simply combines the usage  
121 profiles of individual species to test if a consortium initially composed of an equal  
122 mixture of each of the three isolates consumes substrates in an identical manner  
123 to when they are grown individually, *i.e.* the presence of other microbes does not

124 affect their substrate usage. Any deviations from this model may indicate  
125 compounds that are actively regulated. For example, if a compound is consumed  
126 significantly faster or earlier than predicted by the model, this would indicate an  
127 additional interaction between species such as synergistic or competitive growth.

128

## 129 **Results and Discussion**

130

131 In order to determine the substrate usage profiles of individuals, we designed a  
132 defined medium composed of sufficient levels of standard vitamins, minerals,  
133 phosphate, and ammonium, and limiting levels of carbon (glucose and nineteen  
134 amino acids (see **Materials and Methods**). This medium was designed such that  
135 the species would reach stationary phase within 12 hours and every substrate  
136 could be detected in a single LC-MS run.

137

138 Bacilli and pseudomonads represent some of the most ubiquitous soil bacteria,  
139 and we selected the common soil bacterium *Bacillus cereus* for comparison with  
140 two closely related *Pseudomonas* species, *Pseudomonas lini* and *Pseudomonas*  
141 *baetica* (**Supplemental Figure 1**) that were isolated from groundwater;  
142 taxonomic assertions were confirmed by BLAST search results on the  
143 sequenced 16S rRNA gene. For simplicity, we will refer to the species as *Bc*  
144 (*Bacillus cereus*), *Pl*, (*Pseudomonas lini*), and *Pb* (*Pseudomonas baetica*). Each  
145 species was grown individually in the defined medium, with supernatant samples  
146 collected every hour for 12 hours, and one final time point at 26 hours.

147

148 The absolute concentrations of the 20 growth substrates were quantified at each  
149 time point, and the data were fit to a previously described model for compound  
150 depletion during microbial batch culture<sup>20</sup> (**Figure 1, Algorithm 1**). We observed  
151 that all compounds followed the Behrends model over the course of growth for  
152 each species, with the exception of two compounds: glycine increased over the  
153 first 5 hours of culture from all three species and then decreased logarithmically,  
154 and the methionine depletion profile for *Bc* was indeterminable due to both  
155 variance in the data and a lack of time points from 12 to 24 hours (**Supplemental**  
156 **File 1**). These observations corroborate previous assertions that substrate  
157 utilization by microbes in batch culture follow the shape of a logistic growth type  
158 curve<sup>20-22</sup>.

159

160 To examine the sequence of substrate depletion in finer detail, we used the model  
161 to calculate the time at which each species depleted half of the total amount of  
162 each compound ( $T_h$ ), and when the compound was depleted from 90% to 10% of  
163 the total amount available to the species (usage window) (**Figure 1**), and  
164 mapped them onto the growth curve of each species (**Figure 2A-C**). For *Bc*, we  
165 observed that compounds were half-depleted in three distinct groups (**Figures**  
166 **2A and D**, dotted boxes). *Bc* initially utilized glucose, then a cluster of 13 amino  
167 acids that all had  $T_h$  values within 0.25 h of each other during early logarithmic  
168 growth, and finally half-depleted remaining 6 substrates in late exponential and  
169 stationary phases. Neither of the pseudomonads appeared to utilize substrates in

170 these types of groups, but instead had a more even distribution throughout their  
171 growth curve (**Figures 2B-D**). However, the growth curve of *Pb* did show multiple  
172 growth phases (**Figure 2C**), and so compounds can be mapped to the growth  
173 phase in which they are half-depleted (**Figure 2D**). This observation is more in  
174 line with the traditional view of catabolite repression and multi-auxic growth,  
175 where a lag phase will be observed each time the organism reorganizes its  
176 metabolism to utilize different substrates <sup>23</sup>.

177

178 It is surprising that for these three species we observed three different  
179 combinations of growth curve and substrate utilization profile: a temporally  
180 distinct grouping of compound utilization with only one observed growth phase  
181 (**Figure 2A**), an even distribution of substrate utilization with only one growth  
182 phase (**Figure 2B**) and an even distribution over multiple growth phases (**Figure**  
183 **2C**). This is quite significant given that two of the species belong to the same  
184 genus (*Pl* and *Pb*). This suggests that the metabolic regulatory systems between  
185 the two species are different: while *Pb* slows down its growth, presumably  
186 because it is undergoing a large-scale “switch” of metabolic systems, *Pl* does  
187 not, which may indicate that either all its metabolic systems are constitutively  
188 active, or the regulation of the systems is so perfectly timed that the organism  
189 can seamlessly switch from one metabolic regime to another. *Bc* may also have  
190 an efficient metabolic regulatory system, as even though we observe distinct  
191 temporal gaps between groups of compounds, we did not observe multiple  
192 growth phases.

193

194 To compare the differences in substrate depletion between species, we  
195 compared  $T_h$  across the three species (**Figure 2D** and **Supplemental Table 1**).  
196 Across all three species, glutamine, glutamate, alanine, arginine, proline, and  
197 asparagine, were half-depleted within one hour of each other. Additionally, the  $T_h$   
198 values across all substrates for the two *Pseudomonas* species were close, but  
199 not identical, consistent with their short phylogenetic distance but different  
200 species identity (**Figure 2D**); a similar observation has been described previously  
201 <sup>22</sup>. Considering the differences in growth curves between the two species, this is  
202 quite intriguing, as the general order in which the species consume the  
203 metabolites is not different, but there is this difference in growth profiles,  
204 supporting the hypothesis that there could be significant physiological differences  
205 between such closely related species.

206

207 *Bc* was markedly different from the two pseudomonads, differing greatly in the  
208 amount of time it depleted 8 of the compounds (**Figure 2D** and **Supplemental**  
209 **Table 1**). Of these, the utilization of glucose was particularly interesting, as it was  
210 predominantly depleted before there was any appreciable increase in biomass  
211 (**Figure 2A**). This may indicate that there is a significant delay in substrate  
212 conversion to biomass in this species, or that *Bc* rapidly transforms glucose into  
213 some other compound, for example glycogen.

214

215 We next wondered if the preferred substrates offer some physiological benefit  
216 over less preferable substrates. It is a general assumption in microbiology that  
217 substrates consumed first may be more advantageous than those consumed  
218 later<sup>24</sup>, and that this would depend on the competitive 'strategy' of the organism.  
219 Major strategies suggested include maximal biomass production rate, maximal  
220 growth rate and maximal biomass yield. Generally, copiotrophs are thought of as  
221 r-strategists (maximal growth rate) and oligotrophs as K-strategists (maximum  
222 yield)<sup>25,26</sup>. Given the relatively fast growth rates and high substrate  
223 concentrations in this study we would expect that the order of substrate  
224 consumption would be related to maximal growth rate or biomass production rate  
225<sup>27</sup>.

226  
227 We tested some of these general assumptions by comparing the calculated  $T_h$   
228 values and maximum usage rate of each compound to the specific growth rate,  
229 starting molarity of the compound, and predicted total protein composition of  
230 each species, in order to determine what the substrate preference order might be  
231 correlated with (**Figure 3** and **Supplemental Figure 3**). The specific growth rate  
232 of a species on a compound was determined by growing the species on that  
233 compound as a sole carbon source (see **Materials and Methods**). Surprisingly,  
234 the only significant ( $p < 0.05$ ) correlations between all of these tests were that the  
235 specific growth rate of *PI* on a given compound was weakly correlated with the  $T_h$   
236 of that compound ( $r = -0.652$ ,  $p = 0.030$ ), and moderately correlated with the  
237 maximum depletion rate of that compound by *PI* ( $r = 0.791$ ,  $p = 0.004$ ) (**Figures**  
238 **3C,D**). These correlations support the common assumptions listed above,  
239 especially for flux balance analysis, as the compound that provides the higher  
240 rate of growth is depleted earlier and more rapidly than others. It is interesting  
241 that glucose did not confer the fastest specific growth rate for any of the strains,  
242 despite glucose generally being considered a superior source of energy. This is  
243 not surprising, however, as it is known that pseudomonads preferentially use  
244 amino acids over glucose<sup>28</sup>. The rationalization of this phenotype is that in the  
245 soil environments where many pseudomonads (and *B. cereus*) live,  
246 decomposition products such as amino acids and organic acids are more readily  
247 available than sugars<sup>28</sup>. However, the lack of any strong or significant  
248 correlations in the bacillus and the other pseudomonad indicates that there are  
249 other factors at play that determine an organism's preferred substrate usage. It is  
250 apparent that not all microbes prefer to use substrates sequentially at all; the  
251 grouping of substrate utilization by *Bc* is a striking example of this. The resources  
252 within the second utilization group (**Figure 2A**) conferred a wide range of specific  
253 growth rates, from zero to the highest observed for all substrates, and all were  
254 utilized within two hours of each other (**Figure 3A**). It is likely the case that the  
255 simultaneous usage of these substrates confers the greatest physiological  
256 advantage. *Bc* could possess a metabolic strategy that does not perfectly follow  
257 the well-established paradigm of catabolite repression. Ultimately, it is clear that  
258 bacteria dramatically differ in regulation of catabolite uptake, and it is not prudent  
259 to make general assumptions on microbial metabolism based solely on

260 observations from a few model organisms and/or the energetic potential of  
261 substrates.

262

263 Our experiments to test these correlations yielded a number of interesting results  
264 in addition to those described above. First, all three species grew on glucose as  
265 the sole carbon source without added amino acids. This was not predicted based  
266 on genomic predictions of the species in the Integrated Microbial Genomes (IMG)  
267 database ([img.jgi.doe.gov](http://img.jgi.doe.gov)), which indicated auxotrophy for lysine, phenylalanine,  
268 tyrosine, histidine and serine in the case of *Bc*, and for lysine, histidine, leucine,  
269 and coenzyme A for *Pl* and *Pb*. This observation highlights that all computational  
270 predictions should be treated as only suggestions, and should always be tested  
271 experimentally before making any assertions. Additionally, there were a number  
272 of compounds that did not support growth as sole carbon sources, but were  
273 depleted throughout the growth of the species in our complete defined medium  
274 (**Figure 3**, lightly shaded compounds). This finding indicates that caution should  
275 be employed when making physiological assertions based on single-substrate  
276 studies, for example those that have individual substrates arrayed in multi-well  
277 plates; many microbes can only utilize certain compounds when other substrates  
278 are present, the phenomenon of co-metabolism<sup>29</sup>. We should note, however,  
279 that we do not know the details of how these compounds are depleted in the rich  
280 defined medium, only that they are depleted from the medium; they may simply  
281 be exogenously transformed. Finally, we observed the maximum depletion rate  
282 of all the substrates by the three species to be less than 130  $\mu\text{g}/\text{mL}/\text{hour}$  except  
283 for glutamate depletion by *Bc*, which we calculated to be about 640  $\mu\text{g}/\text{mL}/\text{hour}$   
284 (**Supplemental Table 1**). This rate corresponds to a near instantaneous  
285 depletion of glutamate by *Bc* at about 5 hours into the growth curve (see  
286 **Supplemental File 1**), which is towards the end of the second group of  
287 compounds utilized by this species (**Figure 2A**). Why glutamate would be  
288 depleted so much faster than the other compounds for *Bc* is a mystery, but it  
289 does suggest that there is something unique about the compound that requires  
290 or allows for the flux to be so rapid. Interestingly, in a previous study of  
291 metabolite depletion of a mixture of 470 compounds glutamate was one of two  
292 metabolites depleted by all of the isolates<sup>14</sup>, so it is clearly an important or high-  
293 value compound that *Bc* may have evolved to deplete quickly in order to gain a  
294 competitive advantage.

295

296

297 *Predicting consortium metabolism based on models of individual isolates*

298

299 Having modeled the substrate usage of each species for each compound, we  
300 hypothesized that these models could be combined to predict how a consortium  
301 composed of the three species might utilize the substrates. We simulated the  
302 time-dependent depletion of each compound by a consortium composed of the  
303 bacillus and two pseudomonads (see **Materials and Methods, Equation 2**, and  
304 **Algorithm 2**). Briefly, the functions describing the compound usage by each  
305 species were summed (**Supplemental Figure 2A**), and the time at which this

306 summed use curve reached the total available compound was determined. This  
307 time of depletion was then used to predict how much of a given metabolite each  
308 species would have utilized when grown in co-culture, and the compound usage  
309 by each species was re-modeled (**Supplemental Figure 2B** colored dashed  
310 lines) and added together to form the co-culture prediction (**Supplemental**  
311 **Figure 2B** solid black line). These predictive models allowed us to make several  
312 hypotheses that are relatively simple to test. First is the usage curve of each  
313 metabolite by the co-culture. Related to this, we can predict the time at which all  
314 of a given metabolite will be depleted, and when all metabolites will be depleted.  
315 From this we predict that 14 compounds will be nearly depleted (less than 10% of  
316 starting concentration) by six hours, and all but methionine will be completely  
317 consumed by 9 hours (**Figure 4**). Based on this, one could reasonably argue that  
318 a consortium composed of these three species would reach stationary phase  
319 sometime between 6 and 9 hours, in contrast to the individual species, which all  
320 reached stationary phase after 9 hours.

321  
322 To test our predictions, we inoculated a 3-member co-culture at equal optical  
323 density in the defined medium (see **Materials and Methods**), collected  
324 supernatant time points every hour, and measured the concentrations of all 20  
325 substrates as described for monocultures. We found that many of our predictions  
326 were valid: nearly all compounds (17) were depleted to below 10% of starting  
327 concentration by 6 hours (**Figure 4**, gold), and the co-culture accordingly  
328 reached stationary phase at this time as well (**Supplemental Figure 4**),  
329 presumably because all available substrates were consumed.

330  
331 *Compounds that follow the model are evenly shared*

332  
333 When analyzing the kinetics of depletion of the compounds, we observed that  
334 many (13) compounds agreed very well with the prediction, having  $R^2$  values  
335 greater than 0.9 (**Figure 4**). Most of the compounds with high  $R^2$  values began  
336 to decrease slightly earlier or at a slightly faster rate than predicted, which could  
337 be attributed to experimental error in initial culture density. However, the  
338 depletion of most compounds were still very close to the predicted model,  
339 indicating that the shared usage between the species could be very close to  
340 “blind” conditions, where the presence of other species does not affect the  
341 substrate usage decisions of each individual species. It is important to note that  
342 the high substrate concentrations likely explain the successful predictions using  
343 this simple modeling approach. Specifically, the substrate concentrations, initially  
344 at high micromolar concentrations, are likely well above the  $K_m$  for the  
345 transporters and rate-limiting enzymes. For example many bacterial amino acid  
346 transporters have  $K_m$  values in the low micromolar range <sup>30,31</sup>, such that the  
347 transporters and enzymes are saturated. We anticipate that much more detailed  
348 models accounting for substrate concentration would be required at soil- and  
349 groundwater-relevant substrate concentrations, which can be as low as 0.5-10%  
350 of the concentrations used in this study (<sup>32</sup> and Jenkins et al., in preparation).

351



352 *Compounds that deviate from the model*

353

354 The remaining 7 compounds (glucose, histidine, glutamate, lysine, arginine,  
355 proline, and glycine) deviated significantly from our predictions ( $R^2 < 0.9$ ) (**Figure**  
356 **4**, red text), suggesting some additional species-species interaction(s) is/are  
357 present that affect the depletion of those compounds. It is intriguing that we  
358 detected metabolites that showed both positive and negative deviations.

359

360 Glucose and histidine were both depleted more slowly than predicted. The  
361 simplest explanation for this is that the metabolic systems that deplete these  
362 compounds are indeed concentration dependent. Another possibility for this  
363 would be that there is a buildup of product in the co-culture that exerts feedback  
364 inhibition on the metabolism of these two compounds. This is easily rationalized  
365 for histidine utilization, which is an expensive process for bacteria<sup>33</sup>; they may be  
366 exposed to better carbon sources in a mixed culture as a byproduct of another  
367 microbe. However, glucose being utilized slower is curious. In the monoculture  
368 experiments, we observed *Bc* to deplete glucose before it or either pseudomonad  
369 even started producing appreciable biomass (**Figure 2**). Perhaps this behavior is  
370 inhibited in the presence of the pseudomonads or is a result of changes in the  
371 community structure over the experiment, the assessment of which are  
372 unfortunately beyond the scope of the current study.

373

374 In contrast, glycine, proline, lysine, arginine, and glutamate were all depleted  
375 faster than predicted. This is more difficult to explain and suggests at least one  
376 microbe has altered its phenotype due to the presence of other microbes, or that  
377 other exometabolites are influencing consortial behavior. For example, one  
378 species may have up-regulated metabolic pathways involving these compounds  
379 in an effort to outcompete others, either for the purpose of direct competition for  
380 the substrate, or in order to synthesize antibiotic compounds<sup>34</sup>. Alternatively,  
381 another member may have otherwise sequestered those compounds, effectively  
382 taking them out of a common pool, for example by converting the compound into  
383 some storage molecule, or sequestering it in a way similar to how siderophores  
384 sequester iron. Testing these hypotheses would require an extensive untargeted  
385 metabolomics study, an extremely interesting direction for future studies. Another  
386 potential reason for this early depletion is that the co-culturing of these microbes  
387 has resulted in an emergent function of increased flux of the substrate(s) through  
388 the system. This could be due to a cross-feeding effect where one microbe  
389 depletes an inhibitory compound of another microbe or one microbe's products  
390 induce the co-metabolism of that product and one of these substrates.

391

392 **Conclusions**

393

394 This study examining substrate competition for 20 abundant substrates by 3  
395 species demonstrates that at least some portion of the metabolic behavior of a  
396 microbial consortium can be predicted by measuring the metabolism of microbes  
397 grown in monoculture. This likely can also apply to more complex situations, for

398 example separately measuring the metabolism of an existing microbial  
399 community and a foreign isolate, and predicting what the metabolic function  
400 might be if the isolate were introduced into the community. In any system,  
401 compounds that do not fit the predictions indicate emergent functions of the  
402 coculture and may highlight substrates that are somehow affected by species-  
403 species interactions. These may be occurring passively in the cases of feedback  
404 inhibition and co-metabolism, or actively in the case of one species altering its  
405 phenotype in order to outcompete others. Further studying these outlier  
406 substrates can shed light on metabolic interactions between microbes within a  
407 community. Ultimately, incorporating this predictive strategy when studying  
408 community metabolisms can help pinpoint interesting biological questions, as  
409 well as aid in the design of synthetic consortia.

410

## 411 **Materials and Methods**

412

### 413 *Isolates and identification*

414

415 The 16S rRNA gene for each isolate was amplified using primers 27F  
416 (AGAGTTTGATCMTGGCTCAG) and 1492R (CGGTTACCTTGTTACGACTT),  
417 and sequenced at the Eurofins sequencing facility (Eurofins MWG Operon LLC,  
418 Louisville, KY). Forward and reverse sequences were manually merged and  
419 used as queries using nucleotide BLAST against the 16S rRNA sequence  
420 database at NCBI.

421

### 422 *Phylogenetic Tree Construction*

423 16S rRNA gene sequences were obtained from IMG ([img.jgi.doe.gov](http://img.jgi.doe.gov)), except for  
424 *B. cereus*, *P. lini*, and *P. baetica*, which were directly sequenced (see above).  
425 Gene sequences were aligned using MUSCLE<sup>35,36</sup>, curated using GBLOCKS<sup>37</sup>,  
426 and the tree was constructed using PhyML<sup>38</sup> with 100 bootstraps, using the  
427 phylogeny.fr web server<sup>39,40</sup>. The final tree was rendered using FigTree  
428 (<http://tree.bio.ed.ac.uk/software/figtree/>).

429

### 430 *Growth medium and culturing*

431

432 All bacterial species were initially inoculated from frozen glycerol stocks onto an  
433 R2A agar plate prepared using Difco R2A Agar (BD, Franklin Lakes, NJ) and  
434 incubated overnight at 30 °C. The medium used for metabolomics experiments  
435 consisted of 1x Wolfe's vitamins and 1x Wolfe's minerals solutions<sup>41</sup>, 1.5 mg/mL  
436 ammonium chloride, 0.6 mg/mL potassium phosphate, and 0.1 mg/mL each of D-  
437 glucose and the following L-amino acids: alanine, aspartate, glutamate,  
438 phenylalanine, glycine, histidine, isoleucine, lysine, leucine, methionine,  
439 asparagine, proline, glutamine, arginine, serine, valine, threonine, and  
440 tryptophan. Tyrosine was additionally supplied at 0.01 mg/mL. Species were  
441 individually cultured in 5 mL of this medium overnight at 30 °C from the R2A  
442 plate, then washed 3x by centrifugation at 5,000 xg and resuspending in fresh  
443 medium. Washed cells were used to inoculate 50 mL of the medium in 250 mL

444 Erlenmeyer flasks, at an initial optical density (OD<sub>600</sub>) of 0.012-0.017 as  
445 measured by a SpectraMax Plus 384 plate reader. These cultures were  
446 incubated at 30 °C, shaking at 200 rpm. For co-culture experiments, 50 mL  
447 cultures were inoculated with an OD<sub>600</sub> of 0.012 of each species, resulting in an  
448 initial co-culture density of 0.036. 200 µL of cell culture was aspirated for OD<sub>600</sub>  
449 measurements taken in a 96-well Falcon tissue culture plate with flat bottom. For  
450 all growth experiments, the water used to prepare the medium and uninoculated  
451 medium were incubated alongside the experimental flasks, as controls.

452

453 Growth assays of species on individual carbon sources were performed in 96-  
454 well Falcon tissue culture plates with flat bottom and low evaporation lid, in a total  
455 volume of 200 µL. The medium consisted of the same concentrations of Wolfe's  
456 vitamins and minerals, ammonium chloride and potassium phosphate. Individual  
457 carbon sources were added at a concentration of 0.5 mg/mL. Species were pre-  
458 cultured and washed as before, and wells were inoculated at an OD<sub>600</sub> of 0.05.  
459 The plates were incubated at 30 °C, shaking at "medium" speed in BioTek  
460 Synergy HT and Tecan Infinite F200 Pro plate readers, for 48 h.

461

#### 462 *Metabolomics sample extraction*

463

464 Hourly time points of 1 mL of cell culture and controls (see above) were aspirated  
465 and centrifuged at 5,000 xg to pellet the cells. 800 µL was aspirated from the top,  
466 taking care not to disturb the cell pellet, and split into two 400 µL aliquots, which  
467 were immediately frozen at -80 °C. A calibration curve was created with the  
468 medium used for culturing: 1x culture medium, 1/2x, 1/10x, 1/100x, 1/1000x, and  
469 1/10000x dilutions were prepared using culture medium without any carbon  
470 sources as the diluent. All experimental, control, and calibration curve samples  
471 were lyophilized overnight, and metabolites were extracted in 300 µL methanol  
472 with 25µM <sup>13</sup>C-phenylalanine for use as an internal standard. Final extracted  
473 samples were stored in Agilent 96-well sample plates and immediately analyzed  
474 via LCMS or stored at -80 °C.

475

#### 476 *Metabolomics data acquisition and quantification*

477

478 An Agilent 1290 LC system equipped with a ZIC-pHILIC column (150 mm × 2.1  
479 mm, 5 µm 100 Å, Merck SeQuant) was used for metabolite separation with the  
480 following LC conditions: solvent A, 5 mM ammonium acetate; solvent B, 9:1  
481 acetonitrile:H<sub>2</sub>O with 5 mM ammonium acetate; flowrate: 0.25 mL/min; timetable:  
482 0 min at 100% B, 1.5 min at 100% B, 25 min at 50% B, 26 min at 35% B, 32 min  
483 at 35% B, 33 min at 100% B, and 40 min at 100% B; column compartment  
484 temperature of 40 °C. Mass spectrometry analyses were performed using Agilent  
485 6460 triple quadrupole mass spectrometer. Agilent software (Santa Clara, CA):  
486 Optimizer was used for establishing fragmentor and collision cell voltages as well  
487 as precursor and product ion transitions while Mass Hunter QQQ Quantitative  
488 Analysis (version 6.0) was used for compound quantification. Retention times,

489 collision energies, and transitions for each compound are listed in **Supplemental**  
490 **Table 2**.

491

492 *Substrate depletion modeling*

493

494 The Anaconda package and IPython notebooks were used for all computational  
495 tasks <sup>42</sup>, which will be made publicly available at <https://github.com/biorack> in the  
496 “Predicting metabolic properties of a microbial co-culture” repository upon  
497 manuscript publication by a peer-reviewed journal. Data were stored and  
498 organized using Pandas <sup>43</sup> and NumPy <sup>44</sup>, and graphs created using Matplotlib <sup>45</sup>.  
499 Metabolite depletion was modeled using **leastsq** from **scipy.optimize** <sup>46</sup>, fitting  
500 the data to the Behrends model (eq 1):

501

$$\xi = \frac{a}{1 + e^{\frac{t-t_{50}}{w}}} + o \quad \text{(Equation 1)}$$

502

503 Where *a* is amplitude and *o* is offset (see **Figure 1**). These two parameters were  
504 defined from the data: amplitude was defined to be the average of the *t*=0 data  
505 point and the maximum value data point in the data set of each compound, and  
506 offset was defined as the lowest value in the data set. All other parameters were  
507 solved using **leastsq**, with the criteria that they had to be positive values. The  
508 exact steps are shown in **Algorithm 1**:

509

---

**Algorithm 1: modeling depletion of each substrate by each species**

---

```
1  species ← the set of species used in the experiment
2  substrates ← the set of compounds measured in the experiment
3  t ← time dimension of the experiment
4  for i in species:
5      for j in compounds:
6          dataij ← measurement series of substrate j
7          oij ← minimum(dataij)
8          aij ← average (dataij[0] and maximum(dataij))
9          leastsq parameter fitting of t50ij and wij to data
```

```
10      
$$\xi_{ij} = \frac{a_{ij}}{1 + e^{\frac{t-t_{50_{ij}}}{w_{ij}}}} + o_{ij}$$

```

---

510  $T_h$  and usage window values were calculated from the Behrends model. All  
511 correlation coefficients and p-values were calculated using the **pearsonr** function  
512 in the **stats** package of **scipy**.

513

### 514 *Co-culture predictions*

515

516 The equations representing the depletion of a compound by a species were  
517 subtracted from the initial starting concentration of the compound, creating an  
518 expression that represented the amount of compound used by each species over  
519 time; these are the curves shown in **Supplemental Figure 2A**. These  
520 expressions were summed to generate an approximate total usage curve, and  
521 the time at which this curve crossed the total amount of available compound was  
522 determined. The amount of available compound was defined to be the starting  
523 concentration of a compound minus the lowest offset parameter between the  
524 three species, as the species with the lowest offset parameter for a substrate will  
525 presumably deplete the substrate to that level, but not more, even in a co-culture.  
526 The time of total depletion was used to approximate the amount of compound  
527 that each species would have consumed by that time. The individual usage  
528 curves were capped at this compound level at this time, and transformed back to  
529 compound depletion curves, which were then used to re-fit to the Behrends  
530 equation, generating new models of compound depletion in mixed conditions.  
531 These new models were then summed, producing the predicted total co-culture  
532 usage of each compound. This can be summarized by the general **Equation 2**:

533

$$C - \sum_i^{species} C - \frac{a_{ij}'}{1 + e^{\frac{t-t_{50ij}'}{w_{ij}'}}} + o_{ij}' \quad (\text{Equation 2})$$

534

535 Where  $C$  is the total amount of substrate  $j$  that is available to the mixed culture of  
536 set *species*. This is defined as the starting concentration of  $j$  minus the smallest  
537  $o_j$  in *species*.  $a_{ij}'$ ,  $o_{ij}'$ ,  $t_{50ij}'$ , and  $w_{ij}'$ , are parameters that describe the depletion  
538 of  $j$  by species  $i$  in the co-culture of the individual in the set *species*, shown in  
539 **Algorithm 2**:

540

---

### **Algorithm 2. Predicting co-culture substrate usage**

---

---

```
1  for j in substrates:
2      oj' ← minimum (oj)
3      C ← starting concentration of substrate j minus oj'
4      ψj ← ∑ispecies C - ξij
5      tdj ← t when ψj = C
6      for i in species:
7          Φij ← ξij(tdj)
8          temp ← ξij(tdj:tn) = Φij
9          oij' ← ξij(tdj)
10         aij' ← starting concentration of substrate j minus oij'
11         leastsq parameter fitting of t50ij' and wij' to temp
```

---

541

542

## 543 Acknowledgements

544

545 The strains used in this study were a generous gift from Romy Chakraborty at  
546 Lawrence Berkeley National Laboratory.

547

548 This material by ENIGMA- Ecosystems and Networks Integrated with Genes and  
549 Molecular Assemblies (<http://enigma.lbl.gov>), a Scientific Focus Area Program at  
550 Lawrence Berkeley National Laboratory is based upon work supported by the  
551 U.S. Department of Energy, Office of Science, Office of Biological &  
552 Environmental Research under contract number DE-AC02-05CH11231

553

## 554 References

555

556 1 Moran, M. A. The global ocean microbiome. *Science* **350**, aac8455,  
557 doi:10.1126/science.aac8455 (2015).

558 2 Gougoulas, C., Clark, J. M. & Shaw, L. J. The role of soil microbes in the global  
559 carbon cycle: tracking the below-ground microbial processing of plant-  
560 derived carbon for manipulating carbon dynamics in agricultural systems. *J*  
561 *Sci Food Agric* **94**, 2362-2371, doi:10.1002/jsfa.6577 (2014).

562 3 Ward, B. B. & Jensen, M. M. The microbial nitrogen cycle. *Front Microbiol* **5**,  
563 553, doi:10.3389/fmicb.2014.00553 (2014).

- 564 4 Berendsen, R. L., Pieterse, C. M. & Bakker, P. A. The rhizosphere microbiome  
565 and plant health. *Trends Plant Sci* **17**, 478-486,  
566 doi:10.1016/j.tplants.2012.04.001 (2012).
- 567 5 Cho, I. & Blaser, M. J. The human microbiome: at the interface of health and  
568 disease. *Nat Rev Genet* **13**, 260-270, doi:10.1038/nrg3182 (2012).
- 569 6 Chapin, F. S. *et al.* The changing global carbon cycle: linking plant-soil carbon  
570 dynamics to global consequences. *J Ecol* **97**, 840-850, doi:10.1111/j.1365-  
571 2745.2009.01529.x (2009).
- 572 7 Arrigo, K. R. Marine microorganisms and global nutrient cycles. *Nature* **437**,  
573 349-355, doi:10.1038/nature04158 (2005).
- 574 8 Mueller, U. G. & Sachs, J. L. Engineering Microbiomes to Improve Plant and  
575 Animal Health. *Trends Microbiol* **23**, 606-617, doi:10.1016/j.tim.2015.07.009  
576 (2015).
- 577 9 Silva, L. P. & Northen, T. R. Exometabolomics and MSI: deconstructing how  
578 cells interact to transform their small molecule environment. *Curr Opin*  
579 *Biotechnol* **34**, 209-216, doi:10.1016/j.copbio.2015.03.015 (2015).
- 580 10 Zha, Y. *et al.* Identifying inhibitory compounds in lignocellulosic biomass  
581 hydrolysates using an exometabolomics approach. *BMC Biotechnol* **14**, 22,  
582 doi:10.1186/1472-6750-14-22 (2014).
- 583 11 Casey, E. *et al.* Effect of salts on the Co-fermentation of glucose and xylose by  
584 a genetically engineered strain of *Saccharomyces cerevisiae*. *Biotechnol*  
585 *Biofuels* **6**, 83, doi:10.1186/1754-6834-6-83 (2013).
- 586 12 Henriques, I. D., Aga, D. S., Mendes, P., O'Connor, S. K. & Love, N. G. Metabolic  
587 footprinting: a new approach to identify physiological changes in complex  
588 microbial communities upon exposure to toxic chemicals. *Environ Sci Technol*  
589 **41**, 3945-3951 (2007).
- 590 13 Halter, D. *et al.* In situ proteo-metabolomics reveals metabolite secretion by  
591 the acid mine drainage bio-indicator, *Euglena mutabilis*. *ISME J* **6**, 1391-1402,  
592 doi:10.1038/ismej.2011.198 (2012).
- 593 14 Baran, R. *et al.* Exometabolite niche partitioning among sympatric soil  
594 bacteria. *Nat Commun* **6**, 8289, doi:10.1038/ncomms9289 (2015).

- 595 15 Wilmes, P. *et al.* Metabolome-proteome differentiation coupled to microbial  
596 divergence. *MBio* **1**, doi:10.1128/mBio.00246-10 (2010).
- 597 16 Kovarova-Kovar, K. & Egli, T. Growth kinetics of suspended microbial cells:  
598 from single-substrate-controlled growth to mixed-substrate kinetics.  
599 *Microbiol Mol Biol Rev* **62**, 646-666 (1998).
- 600 17 Shong, J., Diaz, M. R. J. & Collins, C. H. Towards synthetic microbial consortia  
601 for bioprocessing. *Current Opinion in Biotechnology* **23**, 798-802,  
602 doi:10.1016/j.copbio.2012.02.001 (2012).
- 603 18 Brenner, K., You, L. C. & Arnold, F. H. Engineering microbial consortia: a new  
604 frontier in synthetic biology. *Trends in Biotechnology* **26**, 483-489,  
605 doi:10.1016/j.tibtech.2008.05.004 (2008).
- 606 19 Du, R. *et al.* Cellulosic ethanol production by natural bacterial consortia is  
607 enhanced by *Pseudoxanthomonas taiwanensis*. *Biotechnology for Biofuels* **8**,  
608 doi:ARTN 10  
609 10.1186/s13068-014-0186-7 (2015).
- 610 20 Behrends, V., Ebbels, T. M., Williams, H. D. & Bundy, J. G. Time-resolved  
611 metabolic footprinting for nonlinear modeling of bacterial substrate  
612 utilization. *Appl Environ Microbiol* **75**, 2453-2463, doi:10.1128/AEM.01742-  
613 08 (2009).
- 614 21 Behrends, V., Geier, B., Williams, H. D. & Bundy, J. G. Direct assessment of  
615 metabolite utilization by *Pseudomonas aeruginosa* during growth on  
616 artificial sputum medium. *Appl Environ Microbiol* **79**, 2467-2470,  
617 doi:10.1128/AEM.03609-12 (2013).
- 618 22 La Rosa, R., Behrends, V., Williams, H. D., Bundy, J. G. & Rojo, F. Influence of  
619 the Crc regulator on the hierarchical use of carbon sources from a complete  
620 medium in *Pseudomonas*. *Environ Microbiol* **18**, 807-818, doi:10.1111/1462-  
621 2920.13126 (2016).
- 622 23 Gorke, B. & Stulke, J. Carbon catabolite repression in bacteria: many ways to  
623 make the most out of nutrients. *Nat Rev Microbiol* **6**, 613-624,  
624 doi:10.1038/nrmicro1932 (2008).
- 625 24 Raman, K. & Chandra, N. Flux balance analysis of biological systems:  
626 applications and challenges. *Brief Bioinform* **10**, 435-449,  
627 doi:10.1093/bib/bbp011 (2009).



- 628 25 Fierer, N., Bradford, M. A. & Jackson, R. B. Toward an ecological classification  
629 of soil bacteria. *Ecology* **88**, 1354-1364, doi:Doi 10.1890/05-1839 (2007).
- 630 26 Pianka, E. R. R-Selection and K-Selection. *American Naturalist* **104**, 592-&  
631 doi:Doi 10.1086/282697 (1970).
- 632 27 Kremling, A., Geiselmann, J., Ropers, D. & de Jong, H. Understanding carbon  
633 catabolite repression in Escherichia coli using quantitative models. *Trends*  
634 *Microbiol* **23**, 99-109, doi:10.1016/j.tim.2014.11.002 (2015).
- 635 28 Rojo, F. Carbon catabolite repression in Pseudomonas : optimizing metabolic  
636 versatility and interactions with the environment. *FEMS Microbiol Rev* **34**,  
637 658-684, doi:10.1111/j.1574-6976.2010.00218.x (2010).
- 638 29 Nzila, A. Update on the cometabolism of organic pollutants by bacteria.  
639 *Environ Pollut* **178**, 474-482, doi:10.1016/j.envpol.2013.03.042 (2013).
- 640 30 Short, S. A., White, D. C. & Kaback, H. R. Mechanisms of active transport in  
641 isolated bacterial membrane vesicles. IX. The kinetics and specificity of  
642 amino acid transport in Staphylococcus aureus membrane vesicles. *J Biol*  
643 *Chem* **247**, 7452-7458 (1972).
- 644 31 Lombardi, F. J. & Kaback, H. R. Mechanisms of active transport in isolated  
645 bacterial membrane vesicles. 8. The transport of amino acids by membranes  
646 prepared from Escherichia coli. *J Biol Chem* **247**, 7844-7857 (1972).
- 647 32 Warren, C. R. Rapid and sensitive quantification of amino acids in soil  
648 extracts by capillary electrophoresis with laser-induced fluorescence. *Soil*  
649 *Biol Biochem* **40**, 916-923, doi:10.1016/j.soilbio.2007.11.011 (2008).
- 650 33 Bender, R. A. Regulation of the histidine utilization (hut) system in bacteria.  
651 *Microbiol Mol Biol Rev* **76**, 565-584, doi:10.1128/MMBR.00014-12 (2012).
- 652 34 Garbeva, P., Silby, M. W., Raaijmakers, J. M., Levy, S. B. & Boer, W.  
653 Transcriptional and antagonistic responses of Pseudomonas fluorescens Pf0-  
654 1 to phylogenetically different bacterial competitors. *ISME J* **5**, 973-985,  
655 doi:10.1038/ismej.2010.196 (2011).
- 656 35 Edgar, R. C. MUSCLE: a multiple sequence alignment method with reduced  
657 time and space complexity. *BMC Bioinformatics* **5**, 113, doi:10.1186/1471-  
658 2105-5-113 (2004).

- 659 36 Edgar, R. C. MUSCLE: multiple sequence alignment with high accuracy and  
660 high throughput. *Nucleic Acids Res* **32**, 1792-1797, doi:10.1093/nar/gkh340  
661 (2004).
- 662 37 Castresana, J. Selection of conserved blocks from multiple alignments for  
663 their use in phylogenetic analysis. *Mol Biol Evol* **17**, 540-552 (2000).
- 664 38 Guindon, S. *et al.* New algorithms and methods to estimate maximum-  
665 likelihood phylogenies: assessing the performance of PhyML 3.0. *Syst Biol* **59**,  
666 307-321, doi:10.1093/sysbio/syq010 (2010).
- 667 39 Dereeper, A. *et al.* Phylogeny.fr: robust phylogenetic analysis for the non-  
668 specialist. *Nucleic Acids Res* **36**, W465-469, doi:10.1093/nar/gkn180 (2008).
- 669 40 Dereeper, A., Audic, S., Claverie, J. M. & Blanc, G. BLAST-EXPLORER helps you  
670 building datasets for phylogenetic analysis. *BMC Evol Biol* **10**, 8,  
671 doi:10.1186/1471-2148-10-8 (2010).
- 672 41 Atlas, R. *Handbook of Microbiological Media*. 4 edn, (CRC Press, 2010).
- 673 42 Continuum Analytics. *Anaconda Software Distribution Vers 2-2.4.0. Computer*  
674 *Software*, <https://continuum.io>, 2015).
- 675 43 McKinney, W. in *Proceedings of the 9th Python in Science*. 51-56.
- 676 44 Walt, S. v. d., Colbert, C. & Varoquaux, G. The NumPy Array: A Structure for  
677 Efficient Numerical Computation. *Computing in Science & Engineering* **13**, 22-  
678 30, doi:<http://dx.doi.org/10.1109/MCSE.2011.37> (2011).
- 679 45 Hunter, J. D. Matplotlib: A 2D Graphics Environment. *Computing in Science &*  
680 *Engineering* **9**, 90-95 (2007).
- 681 46 Jones, E., Oliphant, E., Peterson, P. & al., e. *SciPy: Open Source Scientific Tools*  
682 *for Python*, <http://www.scipy.org/>, 2001-).  
683

684

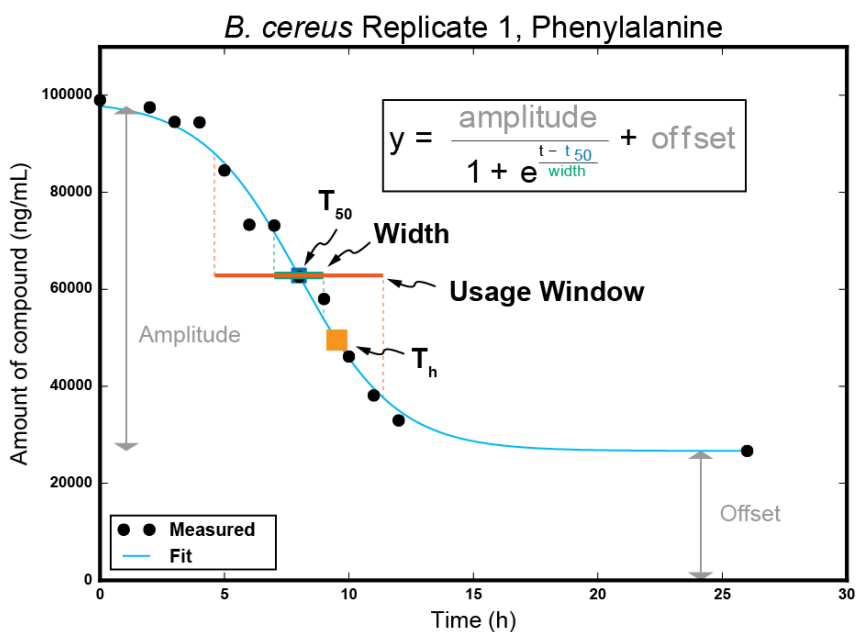

685

686

687 **Figure 1. Modeling usage parameters.** Example curve fitting to Behrends model  
688 (cyan). Blue square indicates the modeled  $T_{50}$  parameter of the Behrends model, or  
689 inflection point of the curve, and the width parameter of the model is depicted by  
690 the green bar centered at  $T_{50}$ . The orange square represents the calculated  $T_h$  value,  
691 or when half of the total amount of compound has been depleted, and the red bar  
692 depicts the calculated usage window, or time when the compound is depleted from  
693 90% to 10% of the total amount used by the species.

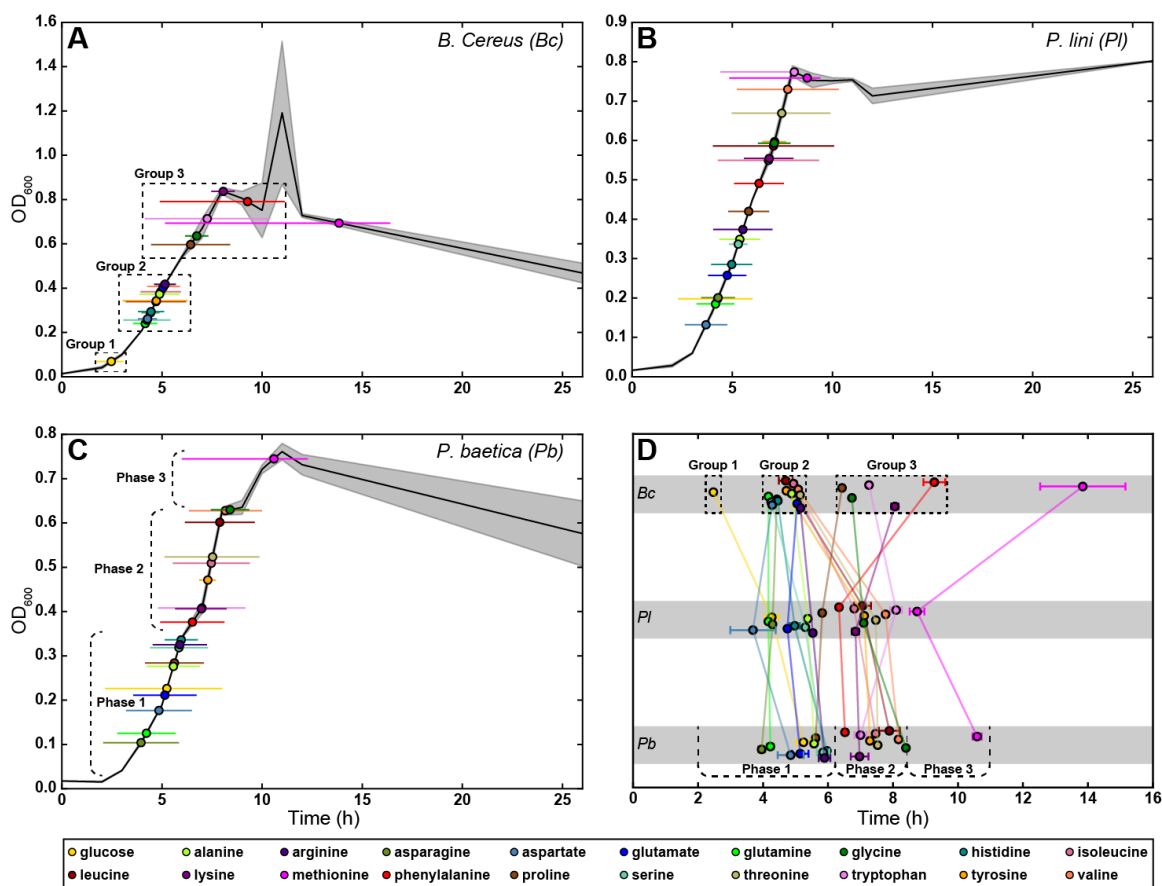

694  
695  
696  
697  
698  
699  
700  
701  
702  
703

**Figure 2. A-C)**  $T_h$  and width for each compound mapped onto the growth curve of each strain. Colored circles represent average  $T_h$  and colored horizontal lines represent the average usage window (time of depletion from 90% to 10% of total resource used by the strain). Solid black line is the average OD<sub>600</sub> of each strain measured over time ( $n=3$ ), with shading representing standard deviation. **D)** Comparison of  $T_h$  values between strains, of all compounds, with error bars representing standard error. Dashed boxes in **(A)** and **(D)** indicate the grouping of compounds utilized by *Bc*, and dashed brackets in **(C)** and **(D)** indicate the different growth phases observed for *Pb*.

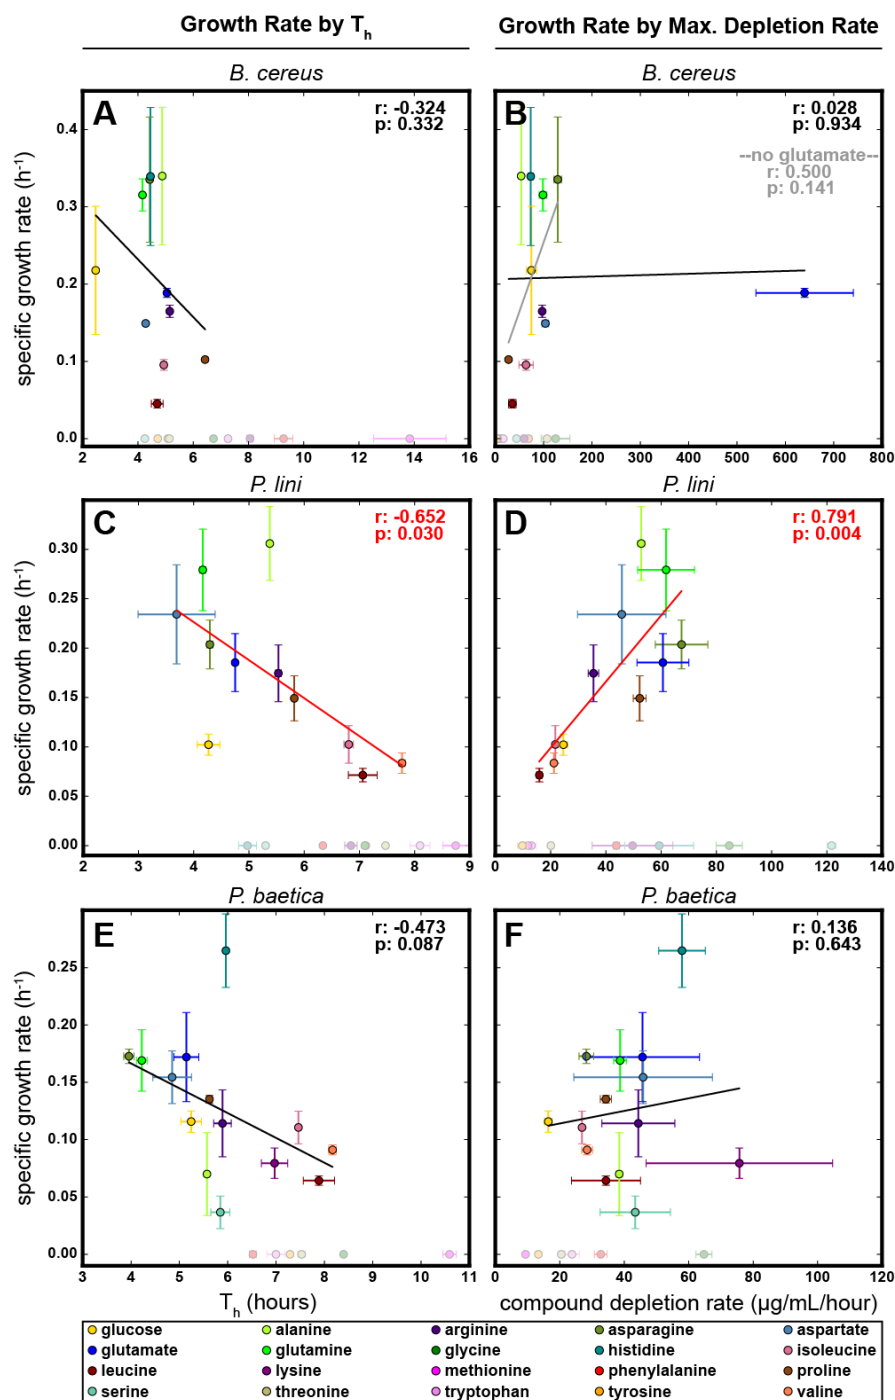

704  
705  
706  
707  
708  
709  
710  
711  
712

**Figure 3.** Correlations between specific growth rate on a compound as a sole carbon source, and  $T_h$  (A, C, E) or maximum compound depletion rate (B, D, F) in complete defined medium for species *Bc* (A, B), *Pl* (C, D), and *Pb* (E, F). Compounds that did not support growth as a sole carbon source (specific growth rate of zero) are shaded lighter at the bottom of each plot. Pearson correlation coefficients (r) and p-values (p) for the set of compounds for which the specific growth rate was nonzero are depicted in the upper-right of each plot. Correlations that had a p-value less than 0.05 were colored red. Error bars depict standard error.

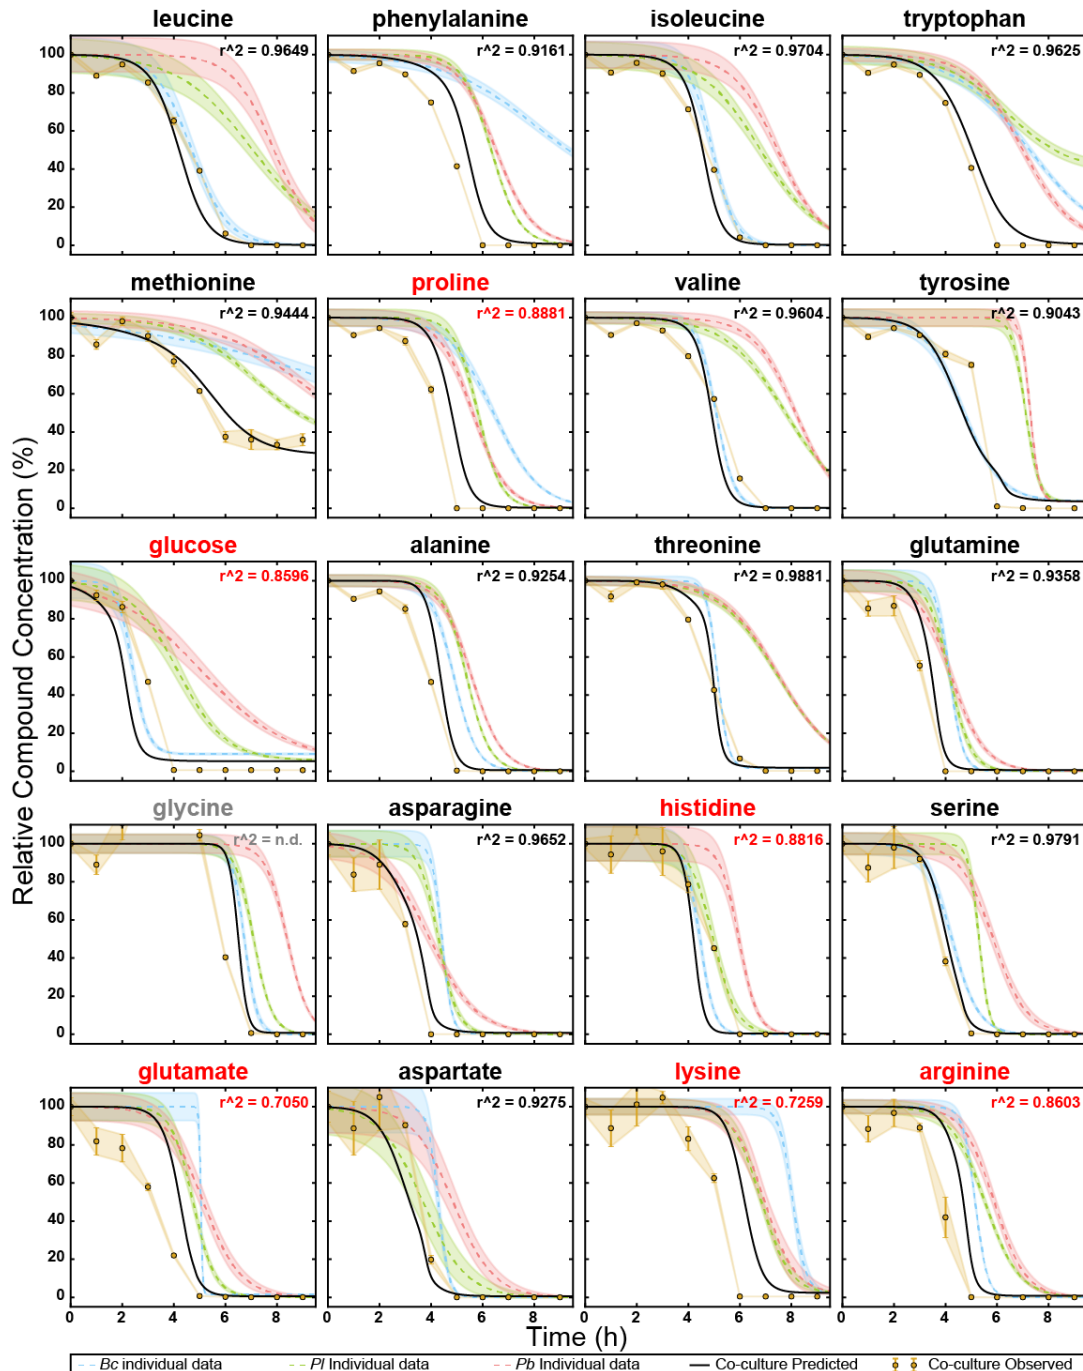

713  
714  
715  
716  
717  
718  
719  
720  
721  
722

**Figure 4. Co-culture observations compared to predictions, normalized to the concentration of each metabolite.** Blue, green, and red dashed lines represent the observed depletion of each compound by *Bc*, *Pl*, and *Pb*, respectively, when grown in isolation. The solid black line is the predicted depletion of a co-culture of all three strains. The golden circles represent the measured compound concentration in the co-culture medium. Error bars and/or shading represent standard error (n=3). Glycine at time point 4 could not be calculated because the measurement was outside the dynamic range of the calibration curve, and the  $r^2$  was not determined (n.d.) for glycine. Non-normalized figure is shown as **Supplemental Figure 5**.
